# Supplementary material
Source: PubMed Central journal article supplement (PMC7270022)
Supplement: ajtr0012-2281-f8.pdf [file ajtr0012-2281-f8.pdf]

## Prognostic value of RNASEH2A in ER+ breast cancer

**Supplementary Table 1.** Summary of download gene expression data sets

| Accession No. | No. of patients | Platforms*         | Country     | Clinical factors# | OS months | PFS months |
|---------------|-----------------|--------------------|-------------|-------------------|-----------|------------|
| GSE7390       | 198             | GPL96              | Canada      | P                 | 4.9-303.6 | 4.0-290.4  |
| GSE1456       | 159             | GPL96/GPL97        | Sweden      | P                 | 2.2-101.9 | 2.2-101.9  |
| GSE2034       | 286             | GPL96              | USA         | P                 | N/A       | 2.0-171.0  |
| GSE4922       | 289             | GPL96/GPL97        | Singapore   | P                 | N/A       | 0.0-153.0  |
| GSE10885      | 154             | GPL885/GPL887      | USA         | P                 | 1.0-118.0 | 1.0-118.0  |
| GSE22226      | 129             | GPL1708/GPL4133    | USA         | P                 | 9.5-82.0  | 6.0-84.0   |
| GSE24450      | 183             | GPL6947            | Finland     | N                 | 22.4-120  | 0.8-60.0   |
| GSE25066      | 508             | GPL96              | USA         | P                 | N/A       | 1.7-88.3   |
| GSE53031      | 167             | GPL13667           | Belgium     | P                 | N/A       | 2.0-156.0  |
| GSE58812      | 107             | GPL570             | France      | P                 | 1.0-171.7 | 1.0-171.7  |
| GSE22220      | 216             | GPL6098            | UK          | P                 | N/A       | 5.0-120.0  |
| GSE3143       | 158             | GPL8300            | USA         | N                 | 5.7-156.2 | N/A        |
| GSE3494       | 251             | GPL96/GPL97        | Singapore   | P                 | 0.0-153.0 | N/A        |
| GSE11121      | 200             | GPL96              | Germany     | P                 | N/A       | 1.0-240.0  |
| GSE12276      | 204             | GPL570             | Netherlands | N                 | N/A       | 0.0-115.0  |
| GSE6532       | 244             | GPL96/GPL97/GPL570 | Canada      | P                 | N/A       | 0.3-174.4  |
| GSE42568      | 105             | GPL570             | Ireland     | P                 | 4.5-99.5  | 4.5-99.5   |
| GSE12093      | 136             | GPL96              | USA         | P                 | N/A       | 7.6-192.6  |
| GSE20624      | 176             | GPL885/GPL887      | USA         | P                 | 1-118     | 1-118      |
| GSE20685      | 327             | GPL570             | France      | P                 | 0-127     | 4.8-169.2  |
| GSE21653      | 266             | GPL570             | France      | P                 | N/A       | 0-222      |
| GSE7849       | 78              | GPL8300            | USA         | P                 | N/A       | 10.3-157.5 |
| NKI           | 295             | Agilent 25K Chip   | Netherlands | A                 | 1.0-220.1 | 1.0-220.1  |
| TCGA set-1    | 526             | N/A                | N/A         | P                 | 0-282.7   | 0-281      |
| TCGA set-2    | 1904            | N/A                | N/A         | P                 | 0-355     | N/A        |
| TCGA set-2    | 564             | N/A                | N/A         | P                 | 0-216.6   | 0-214.7    |

\*Platforms: GPL96: [HG-U133A] Affymetrix Human Genome U133A Array; GPL97: [HG-U133B] Affymetrix Human Genome U133B Array; GPL570: [HG-U133\_Plus\_2] Affymetrix Human Genome U133 Plus 2.0 Array; GPL13667: [HG-U219] Affymetrix Human Genome U219 Array; GPL8269: Agilent UNC PerouLab 244K Custom Human Array version 5; GPL1708: Agilent-012391 Whole Human Genome Oligo Microarray G4112A; GPL4133: Agilent-014850 Whole Human Genome Microarray 4x44K G4112F; GPL885: Agilent-011521 Human 1A Microarray G4110A; GPL887: Agilent-012097 Human 1A Microarray (V2) G4110B; GPL6947: Illumina HumanHT-12 V3.0 expression beadchip; GPL6098: Illumina humanRef-8 v1.0 expression beadchip. #Clinical factors: Age at diagnosis, Elson grade, Tumor size, Lymph node, Metastasis, ER status, Molecular subtype. A: all include; P: partial include; N: none.

## Prognostic value of RNASEH2A in ER+ breast cancer

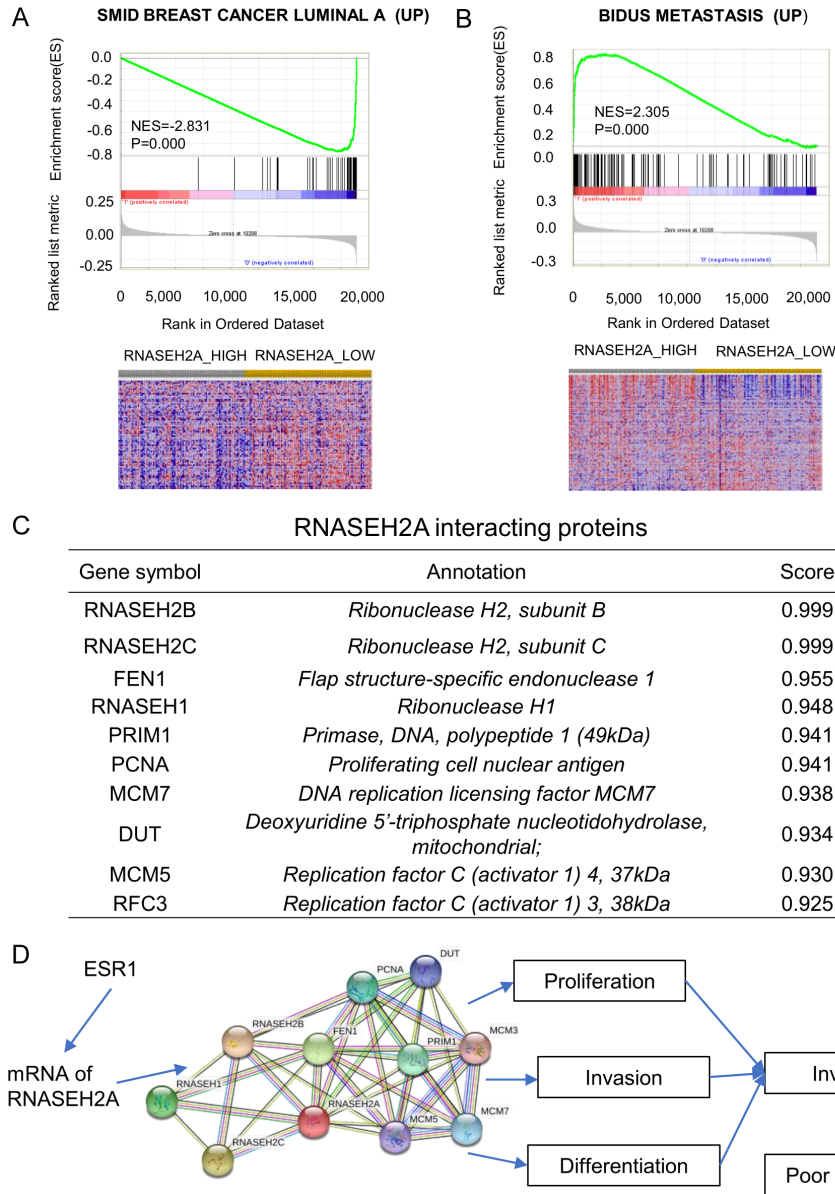

**Supplementary Figure 1.** Bioinformatic analysis of gene signature enrichment and protein-protein interaction networks for RNASEH2A. A. GSEA results of the SMID breast cancer luminal A gene set (upregulation of RNASEH2A mRNA). B. GSEA results of the BIDUS metastasis (upregulation of RNASEH2A mRNA) gene set in the GSE22220 dataset. The functional protein association networks of RNASEH2A. Blue indicates a low level of expression and red indicates a high level of expression. C. The predicted functional partners of RNASEH2A. D. Protein-protein interaction network of RNASEH2A.
